# Supplementary material for: Ultraconserved Sequences Associated with HoxD Cluster Have Strong Repression Activity
Source: PubMed Central journal article supplement — Genome Biol Evol. 2017 Aug 14;9(8):2049–54. doi: 10.1093/gbe/evx148 (PMC5591955; doi:10.1093/gbe/evx148), 2017-08-14
Supplement: evx148_Suppinformation.pdf [file evx148_Suppinformation.pdf]

## **Supplementary information**

**Genomic sequences of ultra-conserved  
regions associated with HoxD locus in  
zebrafish and mouse**

## Genomic sequences of ultra-conserved regions of zebrafish associated with HoxD locus

ZCR1 (300 bp)

CTCCCTGATGATCTAGGAGTGAGGCCATAAAATGTGCACTACTGCTACAATGTCAATTCTGCTGTTAATAATGTGAAGATTATGACGAAAATTG  
CCAATCATGTACCTTGATGGACCTCCTTTGAATGTGGAATGTAAAGAAAGTTCCCGTTCAGAGACTCGCTGTCAAAGCATAACAACCCGCTGTGG  
GAAGTCATTAGACAAGATAGATAAAAGACCTTGAGCATTTCGCATTGTTCTTGGTGTGTAGATTGTACAGTATTAACGTTGGTATTCGTTACCTG  
AGATTTTTTATGATTATTATTTAAAAAAAATCCCTTTCCACCGAGTCTATTCCAATCTTCTATTGGAACTTGGCCGGCTGGGTAGACTTT  
TCTCTCAGAGATGTTCCGCTGATGCGAGCAGTCTCATTAAATCCAAACCGATATTTCCATAATACTCCAGTAGAGACTCTTCACTCACAAATATAA  
TGGGATTATCCACACAACCCAACTTCAGACAAATTGCTCATGCATTCTGTCTGCATACATTTTTTTTTGCTACTGGCGGAATTCTTCTATAA  
AACCTCATTTAAAGATAGCAAAATAGCACTTGTACAGATCAAAATGGTGAATATTTTGTACGACACGCATAGGTTAAATGCATTAAGCCA  
AATGCATTTGACTGCCATCCGAAATGATTAGCTTTGCATATTATTATTCTCATAATTTATGTGACTGTCTGGGTGTTATTTCCAGATGTTAG  
GATTACTCAATCTGACATTACCTCACCCTACAGAAATTAATGCGAAGAAATAGGCCTCATGTCGCAAGCCAAATGATCTGATCCATTGTATA  
TAAAAAGCATATCGCATTGCTGTACCCTTTAAAATGAAAGAAGATTTCTTTTTTTTTTTTTAAATAAAATAGATAAAATGTTACCGAGTTG  
GAGAACAGGGCTGGTTGCCGCTGTTCATAAAATGACAATACTAAAATCCAGTGTCTTCTCCTCCCAAGGGTGGCCGTGATACACGACTCT  
GTACATTACGCTCTGTATTTTACATATTGCCGACTGTATGAATTTTCATATTTCACTTGAGAAAAATGTCAATATAAAAAATGTATATTATGT  
TATTTATTGATGGTGTGTTATTGTAAAAATAAATTTAAAAACGCATTTCTAAAATCGTTATCATTGTGCACAATGATTTTTCTGAAACGAGCAA  
TGCCAAAAAAGGAGGCATAAATACATCTATTTTAATTAAGGCTTATTTACAATGTCCACTATATAAATGTACATTAAGCACGATTTCTGAT  
TAGGATTGAGTAAATCTGAATTGCAACACAGATAAATTTAATTTGCTTCATGCATATTTTTAAAAATGTGATTTTTAAATTAAGTATTTAAAT  
TTTTCTTTTAAAAATTTTTTTAAACGATAAAAAATGTATCCAGTAGGTACAGCAGAGCTCTGCTGTGTAACACATTTCCCTTCTCCTTAG  
TGAGAAAGTGAAGTCTGGCATTAAATTAACGACACTAAAATATGGGGAATATGGAGTCTGCGATCACGGGTATTCCGGCCCTATAATTTACC  
ATTATTTTACATTACCTCTAAATGATACAAGCTGATCTGCTTAATGTCAGCCTGGTTAAATATATACCGGCACACTCCCGGGGACTTTGAG  
ATAAGTTGCTTTCTTTTGAACGTCCTTAAAGAAATGGGATTAGAGGCGCAGCAAGAGTGTGATGTATCGCCATGTTTCGTTATGCTCTTTA  
CCAAGGCGAGGTTACAACCCGTACAACAAAGGCATTGAGATAGATGGAGAGGCAAACTGGAGAAGACAGAGGCGAGAAAAACACTGGCCA  
CAATAACGCCATGTTTTGTATCCAATGTGCAAGACTGAAAAAGAATTCATCATAAAATGCAGCAAACTGTCTGTCACCTTAGGCGAATTGC  
TTCTGACAAGAAAATAAATCTGCGGGTGTGTTAATATATTTTTTTTTCTTTATTTTCGGTGCTAATAGAAAACCCAAATTAATGTCCACCAGCA  
AGATAGAAATGCAAGATCGATGATCTCCCGTACTGTCCAATCACGCCGTTTAATTGACTGTATTTCTGGGTAATTGAAGTCTTGTGTAA  
ATTGGAGATTTATAGAAACGACATAAAAACTACATTTACTGACATTCATCGCATCTTTGACATTGATTATCTGATCAGCGCGTGCATGCTAAC  
TCCAATTTCTTACACACTGTTTATGAGCTGTTGCAGAACAACCTCGCTGTTCCACTGTGATTGATTGCTTATTAACGCGTGTCTTGTAAAGTG  
TGACCGAAGTATTACGATGATATGTTTAGAATAATGTTTCAATTTAGTGTACTGCGAGTAATGCGAGGTGACAGCTGCTGCGGGGAGGACAAA  
ATCCGAACACTACAGGGAGCACGTGGGGCCAAACACTGTTGTTTTAAGGTGGAACCTCACAAATACGAATCGCGGGCGCAAAGCGATGCCCTGC  
GACTGAACCTGCGCGCTACATTTTTGGGAACTATATAACGCATTGTGCCGTGGAGAGTCAACGCTGCCAATCAGACAGTTTTTAATCAAATAC  
GTAATAGAAATAATTTGGTAAAGCCACCCAAAGCTGTCAGTGTGATATTTTTCAGTGGTCTGAAAGGGGTGAGGGTATCCCATCCAGTTGC  
TGCGATTGAACTGAAACGCTCGACGTGCTAACGATAAATGAAGTCTTTATGCTGGGGGTGATATTATAGGGTTTACCTCGCCATATGTTATCA  
TGCAATTTCTGTAATGAATTGCATCCAAAAATGATAAAAAAAACATGGTCTTTTGGTAATATGGAGAATTATATCAGATGAAACGTGATTT  
AAATAAGTAAACACAACGCGCATCTACTACCCAGAAAGCATATATATATATATATATATATAAAGTCTATTAGCCGTCTAAACATA  
GCCTAGGCTTAATTTGGGGTGTGAGCGAAGATAGACGTCTAACCATAGCCTAATATTAGACAGGTCTAATAGACGAATATATCCGTATAATAG  
CCGGTGAATTTGATCTAGGCTAAAACAGGCTAAATTTGGCCTGTCAGTGAATAATCAATTACGCTAACCATAGCCTAAGTCTTATTATAC  
ACCTACACAACGACTGATAAGCTGATAACACCGAGTCAATGATCGCCGTTAAACAGTCTCAACAAAGCTTACTATTGCTTTGTTTTGTTGA  
CACCATTAAGGGAAACAGAAGGGAAAGTTCGTGTAACACAAGCACCAGGCTGTGATGAGGAGATTTATGCATCAATTGAAACTATGGCCACC  
CTGTTTGTCTCAAATGAACGCTTCTGTTCAAATGTTGCTTTTATATATTATGTGACATTAATTAACATAGCTCATTAAAGACGGAATGAAATGGT  
TAAATTAACCTATCAACCCATAATGATGATGAATGGGGTAGTAATTCAGATACAAGCTGGCAATTTGCAAGTCTGCACATTTTGATAGTTCTCA

ZCR2 (760 bp)

ZCR3 (250 bp)

Coordinates from UCSC browser danRer7\_dna range= chr9:1,996,709-2,000,392.

Different CRs are highlighted with different colors: Yellow=ZCR1(chr9:1,996,709-

1,997,009), Green=ZCR2 (chr9: 1,998,365-1,999,125) and Blue=ZCR3(chr9: 2,000,143-2,000,392).

## Genomic sequences of ultraconserved regions of mouse associated with HoxD locus

MCR1 (315 bp)

GCTATTCAAATGTTATTTGAGAACCATCAGAATGCGTAAACTTGCAAATGGCCAGCTTGATCTGAATTAATACCTCATTATCATCATTATGGGTTGATAAGTTAAT  
 TTAACCATTCATTCTGCCTTAATGAGCTATAGTTAAATTAATGCCACATAATATATGAAAGTAACATTTAAATAGAAGCACTGGGCTGAGACAAGCCGAGGCTGCTGC  
 TATTTGGGCTGAAATAAGGTGACATAAATCTTTCTTACAGGACCCAGTCTGCTCCACCAGCAGTTATGAAGTATTTTCACTTCTTTTTCGGAAGTTGCTT  
 TGCCAAATAGCATAGGTAATATGTGGGCTGTAAATAATGCCTGAGGAAGTATTTATTAAGTAAGATCAGGGTGAGTTAGAGGAATTTACAAAAAGGCGGTTCA  
 CAGGCTGCTTACCACGACGACACCAGGATTACCAAGGCCCTTGCCAGCGTCCCGTAGCTCGTTCACTGTGCTCTCCCGGCTGATTGTACTGGGTTCTTTGCTA  
 AGTGTGCTGTTCTGAGTTACATCTCAGAAACTAGCTTGCCCTCTTTCTCACTTGCCAACCTGGACTACTCTTTTTCTGAGACCCTGCTCTCCCTTACCCCA  
 TAGGCAGGCATACCATGACCCTGGTTTCTAAAGACAGGGAACAGGGCACAGTGAGTGTGACTGTCATTCTTGCAAAACGTTATTAATAGAAGTGAAGGCCCG  
 GACCACCCCCAGGAGCACCTGGGAGCTTCCACAGGTGTTAGGGCTTATGTTAGCACAGCTGGAGTAAGAGGACTATGAAAGAAAAAGGAGGACAAAGG  
 GAGAAAAAGAGAGCAACCCAGAGTCATAGTTCTTTGAGACCTCCCACTCTCATCTCAAGCCAGCCCTTAGGACAAATTTAAACTAAAGAAAGATTCTTCCGAC  
 CAGCACGAGCGGGGACAGGCTTTGTGGGTGAGGAATCTATGAAGCCACAGAGTCTGGACTTAAATCAGCGCCCTCCCATGATCTTAAAAATCCTACTAA  
 CTTTTGGACAAAGGGTTCATATTTTGTATCTTAGCAAGGCAAATGTGCGGTCTGCTAAGTTGGTGGGAAGGAAAGAAATGCTGGCTCTCCTCAAGTGC  
 AGGGCTATTTGTAAGTGAATCTGTGGGAATTTAATAGACAAAACATGTAGGCTCACAGGTTTCCAAAATCAGTCTTTTATTGGATAGGTTGGGGGACTCAC  
 CTAAGGGCTGAGCCTAAAAGTGAATGCACCCTAATTTCTGAAACATCAGACTCAAGGAAACACCTATAGGCTGGCTTGGGTGCACAGCCACTTCTCGCACA  
 TAGAGCTGAGGAAAGGGACTCAAGTTAAAGCAAAGTTCCAAACCTTCCAGCGATTGAAATGAACGGGATAAGAAAAGCTCTCCAAAGCTTGGTGAGAAAT  
 GGAGAATTTAACACTCAGGCTGTGTAATGGGCTTTTACAAGGTAGACTCTTACTTATTTTGTGACTGTTTTTAACCTAAAAACAGGATACTGAAACA  
 CTCTTGGCAGAAAAAAAAGTGAACCTAATTTCTACAAAAGAACAAATGGGAAGAAACCTACCAGCAGACTGATCTCGTTAGCTTATTTAACTGTAGCCATTGTTTAGC  
 AATATATTTTATATTTCTGAGTTAGAGAGCCAGGGAAGCAAGGTGAGTCTTCACTGGGACAAGAAAGCAGCACACACTTGCATTTCTCTTGGGGTGGTC  
 TGTCCACCTAAATAACTGGGCTTTTGTCCAAACGCGCCCTGTAGTTCAGGTTCTTTTTTTTTTTTTTTTTTTTGTCTCCCTCGCAGCAGCTGCACCTGCATTA  
 CTGCGAGTCAGTAAATGAAACATTATTCTAAACATA

MCR2 (800 bp)

GCATCGTAATCAGTTCGGTACACTACAAGAACACGCGTTAATAAGGCAATCAATCACCTTGGAAACAG  
 CAAGTTGTTCTGTAACAGCTCATAAACAGTGTGTAATGAAGAATTGGAGGTTACCGTGACATGCGTTGATCAGATAATCAATGTCAAAGATGCGAATGTCAGTAA  
 ATGTAGTTTTCATGCTGTTCTATAAAAATCTCAATTTACAACAAGCAGTCAATTACCAGAAAAACAGTCAATTAATAGGGGTGATTGGACAGTAGGGGGTGG  
 ATCATGATCTTGCATTTCTATCTCGCCAGTGGACATTAATTTGGTTTTCTATTAGCGAGGAAATAAGAAAATATAAAATATATAAACACCTACAGATTTATTTT  
 CTGTCAAACAATTCAGGCTTGATGACAGAGCTTCTTCATTTATGATGAATTTATTTTCATTTTGCACACTTGAGGCAAAAAAAAATATATATATACG  
 CTGTTATTTGGACAGGGTTTTTGGCCACTGTCTTTTTCTGTTGCTGGCCATCTATCTCAATGCTTTGTTTTAAGGGTTACAACCCCGAGTTAGCAAAAAGCAGC  
 GAAAACAGGGTGATACACTACCACTCCAATGTGCTGCTATAATCGTATTTCTTTAAGGGGGCATCAAGAAAAGAGAGATGGGGGAAAGAGAAAAGCACTTATC  
 TGGAGGGGGAGGGAACCTCGGGATTACTCAGTATATATTAACCAACCTGCAATTAAGACGGTATCAGCTGTATCA  
 TTTAGAGCTAATGCAATAAATAGGTA  
 AATTACAGGCCAAAATGGCTGTGATCGCAGCCTGTATTTCCCAATAGTGTCTTCTGCTTCAATTAATGCTGGGTGAGCAGTTGGGAAAAGAAAATTTGAGGA  
 AGGGACATCTTGGTTTTAAATCGAATAGAATAGACCGCTTTGTACACACCATTGACTCTTGCATTTTCCATCGGAATATCGATTTAAGGCAGATCTGTAATAACAC  
 AAAGAGTGGGATTAACACTCAGAAAAGGAGCAGAGGTTGGAAGGAGGAAACCAATTTAAGGGGAAAAAGGAGAGAGAGGGAGGGGATGTCGATTTTTTA  
 ATTATTTGATGCTGATATTCATAGCCATTAATGTGACAGCAAGTGAAGTTAAAGAACTCACCATACCCAAAGGGGATTTAAGGAGCTGCACCTGGCAA  
 AGGAGAGAAAGGTGTTGATGCTCCAAGAATCTGTTAGGTTTAGGCTTTTTTCTAAATGAAAGATTAAACATAATCTTTAAATATGGCAGTAAATGGACATG  
 TTAATTAGATGGGAAATCATTATTGTTACCTTTGCATGGCTGCAACATAAACAGCCCTATGCTGGAAGCCTGTGTACACTCCCTCGTCTCTATAAGGC  
 ATATCCACACACTCCTAAGTAACTGCTTATCTGTTAGCCAGCAATTAACGCTAAACCAATGTTGGATGATGCTGCTTCTTATAAACATGAGTAATGATTT  
 GCTGTAATAAATGATTAGAATGAATTAATCCGCTGATATGTTATATAGGATTTAAATATGTTGTTTTAAGAGATTTTATAACCTGGATGCCACAGTTAAAA  
 ACAACACACAGCATGACCCTTTGCAATCTTAAACAAATAAAATGCTCTGATTTAAATAACATTTATTTACATGAGCAACACAATAAATACGTAATATACA  
 AAGCTTTAATATTGCACATTTGAAAAATCTTACAGTGAGTTCATACAGCCAGCAATTTAAAGCACAAAGACTTTATTACAGATTTATTTATATACTAGCCA  
 GATCCAATGGACCTAACATAAGATGAATTTATGTTTATTTTACCAGCAGCTTCTCAATCATATATATTTGGGAGGGGATGTAACACTATTGCTCAAAAGTACC  
 TTATATACATCTGATAGCTGATACATAACAAAGAGCTTAAACAATCTAGAAAGGTAAGGCTGATAAAGGATACCATATTTTGGTTTTTTTATTAGTCTTAAATATATA  
 TTAATATTTAATGTAACCTAGTGAATATGAGCTGGTATAATCATTCTTTTACATAAGTAGTCTTATCTTTAGAAAAAAGTTGAGTTTAGATCATTGTTATTTT  
 CTGGAAAGTTCTTAAATATTTTATGGGAATATCATAAATAATCACAAGAGTTTTTAAATACTGCTTCCCTTGAATCTTTTCACTTGATAAAAAAATTTCTGGAA  
 AAATTAATTTTCAACATATAGTAAAAAATCTATCCTCAGGAAGTGAATTTAAATCCAGTGTCTTTAAATAACAACAACAAAAAATGCTAGGAAACGAA  
 TTTGAAATAAATCACAGAAAACGTGCCAATGTGATCTATGGATGTGTACCTTATATATGATTTAAGAGCAGGATATATATGATATACATAGATATACAT  
 ATATATACACATACACGAGGTTGCATACACATATACCACTTTGCTGGGCTAAGCATGCAAGTATTTTAGGGTTTCACTCTCAGAAAATCTCATTATGTGA  
 GGAGGAAAGTGGCTCAGCGGGGAGCATTATGGAATATCTGGGCTGATTTAAT

MCR1 (315 bp)

GAGGCTGTTCACTTGGGAAATCAACTAACAGAGAAAAGTCTACCCAG  
 GGCGTCAAGTTACCAAAATGAAAATGGCCATTGAGATGATAAGAAGCTGGCTTTTTTCTGCGAAATCACTTCAAGTAACAGAGATAACATTAATAACGTACATT  
 CTATGCCCAAGAACAAATGTTTTATGTACCGAGTCTTATCCGTTCTCTTAAGTACTTCCCTAGCGGGTTGTTAGTACTTGACAGCAGGTTCCCGTGCAGGGAACCT  
 TTCTCAATTCACATTCAAAGGAGGTCCATCAGAGCATGAT

Coordinates from UCSC browser mm10\_dna range=chr2: 74,649,244-74,654,293.  
 Different CRs are highlighted with different colors: Yellow=MCR1(chr2:74,653,980-74,654,293), Green=MCR2(chr2: 74,651,238-74,652,043) and Blue=MCR3(chr2: 74,649,244-74,649,507).
